# Supplementary material for: Predictive risk factors of phenoconversion in idiopathic REM sleep behavior disorder: the Italian study “FARPRESTO”
Source: Springer Nature journal article supplement (doi:10.1007/s10072-022-06374-4), 2022-09-10
Supplement: MOESM1 [file 10072_2022_6374_MOESM1_ESM.pdf]

**Table S1. The FARPRESTO Consortium**

|                                                                                                                                                                                                                                                                                                                                                                                                        |
|--------------------------------------------------------------------------------------------------------------------------------------------------------------------------------------------------------------------------------------------------------------------------------------------------------------------------------------------------------------------------------------------------------|
| 1. Monica Puligheddu, Michela Figorilli, Elisa Casaglia<br>ID Sleep Disorder Centre, University of Cagliari                                                                                                                                                                                                                                                                                            |
| 2. Claudio Liguori, <sup>a,b</sup> Fabio Placidi, <sup>a,b</sup> Francesca Izzi, <sup>a</sup> Nicola Biagio Mercuri, <sup>a-b-c</sup><br>a Sleep Medicine Center, Neurology Unit, University Hospital of Rome Tor Vergata<br>b Department of Systems Medicine, University of Rome Tor Vergata<br>c Santa Lucia Foundation, Rome                                                                        |
| 3. Dario Arnaldi, <sup>a,b</sup> Pietro Mattioli, <sup>a</sup> Flavio Nobili <sup>a,b</sup><br>a Clinical Neurology, University of Genoa<br>b IRCCS Ospedale Policlinico San Martino, Genoa                                                                                                                                                                                                            |
| 4. Federica Provini, <sup>a,b</sup> Luca Baldelli, <sup>a</sup> Pietro Cortelli <sup>a,b</sup><br>a Department of Biomedical and NeuroMotor Sciences (DiBiNeM), University of Bologna, Bologna, Italy<br>b IRCCS Istituto delle Scienze Neurologiche di Bologna, Bologna, Italy                                                                                                                        |
| 5. Michele Terzaghi, <sup>a,b</sup> , Giuseppe Fiamingo <sup>b</sup><br>a Mondino Foundation IRCCS, Pavia, Italy<br>b Department of Brain and Behavioral Sciences, University of Pavia, Pavia, Italy.                                                                                                                                                                                                  |
| 6. Valerio Brunetti <sup>a,b</sup> , Giacomo Della Marca <sup>a,b</sup> , Paolo Calabresi <sup>a,b</sup><br>a Dipartimento di Neuroscienze, Università Cattolica del Sacro Cuore, Rome, Italy<br>b Fondazione Policlinico Universitario Agostino Gemelli IRCCS, Rome, Italy                                                                                                                            |
| 7. Luigi Ferini Strambi <sup>a,b</sup> , Marco Zucconi <sup>b</sup> , Alessandro Oldani <sup>b</sup> , Sara Marelli <sup>b</sup> , Alessandra Castelnuovo <sup>b</sup> , Francesca Marta Casoni <sup>b</sup><br>a Vita-Salute San Raffaele University, Milan, Italy<br>b IRCCS San Raffaele Scientific Institute, Department of Clinical Neurosciences, Neurology-Sleep Disorders Centre, Milan, Italy |
| 8. Enrica Bonanni, Michelangelo Maestri, Gabriele Siciliano, Domeniko Hoxhaj, Alessia Pascazio, Roberto Ceravolo.<br>UO Neurologia, Dipartimento di Medicina Clinica e Sperimentale, Università di Pisa                                                                                                                                                                                                |
| 9. Biancamaria Guarnieri, Ilde Pieroni, Lucia velluto, Gianluigi Cerroni<br>Centro di medicina del sonno AIMS, UO di Neurologia, Casa di cura privata accreditata Villa Serena, Città S. Angelo, Pescara                                                                                                                                                                                               |
| 10. Raffaele Ferri<br>Centro di medicina del sonno AIMS, IRCCS Oasi Maria SS, Troina                                                                                                                                                                                                                                                                                                                   |

|                                                                                                                                                                                                          |
|----------------------------------------------------------------------------------------------------------------------------------------------------------------------------------------------------------|
| 11. Andrea Gagliardo,<br>U.O. Neurofisiopatologia Laboratorio Del Sonno Clinical Course. Palermo                                                                                                         |
| 12. Mariantonietta Savarese<br>Centro di Medicina del Sonno (Multidisciplinare),U.O. Neurologia Universitaria<br>“FrancoMichele Puca”, Azienda Ospedaliero Universitaria Consorziale Policlinico di Bari |
| 13. Riccardo Cremascoli<br>Centro di Medicina del sonno IRCCS Auxologico Piacavallo, Oggebbio (VB)                                                                                                       |
| 14. Elisa Testani<br>Neurologia e Neurofisiologia Clinica,AOU Senese                                                                                                                                     |
| 15. Fabio Placidi<br>Centro del sonno, UNIT trattamento neurologico della fragilità. UOC Neurologia, Policlinico<br>TorVergata, Roma                                                                     |
| 16. Gianluca Rossato<br>U.0 . Neurologia IRCCS Sacro Cuore Don Calabria (Negrar, VR).                                                                                                                    |
| 17. Gian Luigi Gigli, Gaia Pellitteri, Sara Tartaglia, Giovanni Ermanis<br>Azienda Sanitaria Universitaria Friuli Centrale (ASU FC) - SOC Clinica Neurologica e di<br>Neuroriabilitazione Udine          |
